# Supplementary material for: Syzygium jambos Displayed Antibacterial and Antibiotic‐Modulating Activities against Resistant Phenotypes
Source: Hindawi journal article supplement (doi:10.1155/2018/5124735), 2018-01-01
Supplement: f1 [file 5124735.f1.pdf]

# ***Syngysium jambos* displayed antibacterial and antibiotic-modulating activities against resistant phenotypes**

Brice E. N. Wamba<sup>1#</sup>, Paul Nayim<sup>1#</sup>, Armelle T. Mbaveng<sup>1\*</sup>, Igor K. Voukeng<sup>1</sup>, Joachim K. Dzotam<sup>1</sup>, Ornella J.T. Ngalani<sup>1</sup>, and Victor Kuete<sup>1\*\*</sup>.

<sup>1</sup>*Department of Biochemistry, Faculty of Science, University of Dschang, Cameroon*

#: the two authors contributed equally to the work

## **Author's addresses**

Elvis B. N. Wamba: [wambaelvis@yahoo.fr](mailto:wambaelvis@yahoo.fr)

Paul Nayim: [nayimpaul@yahoo.fr](mailto:nayimpaul@yahoo.fr)

Armelle T. Mbaveng: [armkuete@yahoo.fr](mailto:armkuete@yahoo.fr)

Igor Voukeng : [Tefogang@yahoo.fr](mailto:Tefogang@yahoo.fr)

Joachim K. Dzotam: [kamgue\\_joachim@yahoo.fr](mailto:kamgue_joachim@yahoo.fr)

Ornella J.T. Ngalani: [ngalaniornella@yahoo.fr](mailto:ngalaniornella@yahoo.fr)

Victor Kuete: [kuetevictor@yahoo.fr](mailto:kuetevictor@yahoo.fr)

## **Corresponding authors:**

\* Tel.: +237 675468927; E-mail address: [armbatsa@yahoo.fr](mailto:armbatsa@yahoo.fr) (Dr A.T. Mbaveng)

\*\* Tel.: +237 677355927; E-mail address: [kuetevictor@yahoo.fr](mailto:kuetevictor@yahoo.fr) (Prof. Dr Victor Kuete)

**Table S1. *Staphylococcus aureus* strains and features**

| <b>Bacteria</b>         | <b>Features</b>                                                                                                                                                                                                      | <b>References</b> |
|-------------------------|----------------------------------------------------------------------------------------------------------------------------------------------------------------------------------------------------------------------|-------------------|
| <i>S. aureus</i> MSSA1  | Clinical isolate : Met susceptible ; Nis <sup>r</sup> ,<br>Chl <sup>r</sup>                                                                                                                                          | [1, 2]            |
| <i>S. aureus</i> MRSA3  | Clinical isolate : Ofxa <sup>r</sup> , Kan <sup>r</sup> , Tet <sup>r</sup> , Erm <sup>r</sup>                                                                                                                        | [1]               |
| <i>S. aureus</i> MRSA4  | Clinical isolate : Ofxa <sup>r</sup> , Kan <sup>r</sup> , Cyp <sup>r</sup> , Chl <sup>r</sup> ,<br>Gen <sup>r</sup> , Nis <sup>r</sup> , Amp <sup>r</sup>                                                            | [1, 2]            |
| <i>S. aureus</i> MRSA6  | Clinical isolate : Ofxa <sup>r</sup> , Flx <sup>r</sup> , Kan <sup>r</sup> , Tet <sup>r</sup> ,<br>Cyp <sup>r</sup> , Im/Cs <sup>r</sup> , Chl <sup>r</sup> , Gen <sup>r</sup> , Nis <sup>r</sup> , Amp <sup>r</sup> | [1, 2]            |
| <i>S. aureus</i> MRSA8  | Clinical isolate : Ofxa <sup>r</sup> , Flx <sup>r</sup> , Kan <sup>r</sup> , Erm <sup>r</sup> ,<br>Cyp <sup>r</sup> , Im/Cs <sup>r</sup> , Chl <sup>r</sup> , Gen <sup>r</sup> , Nis <sup>r</sup> , Amp <sup>r</sup> | [1, 2]            |
| <i>S. aureus</i> MRSA9  | Clinical isolate : Ofxa <sup>r</sup> , Flx <sup>r</sup> , Tet <sup>r</sup> , Erm <sup>r</sup> ,<br>Cyp <sup>r</sup> , Im/Cs <sup>r</sup> , Chl <sup>r</sup> , Gen <sup>r</sup> , Nis <sup>r</sup> , Amp <sup>r</sup> | [1, 2]            |
| <i>S. aureus</i> MRSA11 | Clinical isolate : Ofxa <sup>r</sup> , Kan <sup>r</sup> , Erm <sup>r</sup> , Cyp <sup>r</sup> ,<br>Im/Cs <sup>r</sup> , Chl <sup>r</sup> , Nis <sup>r</sup> , Amp <sup>r</sup>                                       | [1, 2]            |
| <i>S. aureus</i> MRSA12 | Clinical isolate : Ofxa <sup>r</sup> , Flx <sup>r</sup> , Kan <sup>r</sup> , Erm <sup>r</sup> ,<br>Im/Cs <sup>r</sup> , Chl <sup>r</sup> , Gen <sup>r</sup> , Nis <sup>r</sup> , Amp <sup>r</sup>                    | [1, 2]            |
| ATCC 25923              | Reference strain                                                                                                                                                                                                     | /                 |
| SA01                    | Clinical isolate : Erm <sup>r</sup> , Amp <sup>r</sup>                                                                                                                                                               | [3]               |
| SA07                    | Clinical isolate : Erm <sup>r</sup> , Dox <sup>r</sup>                                                                                                                                                               | [3]               |
| SA18                    | Clinical isolate : Amp <sup>r</sup> , Dox <sup>r</sup> , Vm <sup>r</sup>                                                                                                                                             | [3]               |
| SA23                    | Clinical isolate : Imi <sup>r</sup> , Aug <sup>r</sup>                                                                                                                                                               | [3]               |
| SA36                    | Clinical isolate : Dox <sup>r</sup> , Vm <sup>r</sup>                                                                                                                                                                | [3]               |
| SA39                    | Clinical isolate : Amp <sup>r</sup>                                                                                                                                                                                  | [3]               |
| SA56                    | Clinical isolate : Amp <sup>r</sup> , Dox <sup>r</sup>                                                                                                                                                               | [3]               |
| SA64                    | Clinical isolate : Amp <sup>r</sup> , Dox <sup>r</sup>                                                                                                                                                               | [3]               |
| SA68                    | Clinical isolate : Amp <sup>r</sup> , Vm <sup>r</sup>                                                                                                                                                                | [3]               |
| SA88                    | Clinical isolate : Erm <sup>r</sup> , Vm <sup>r</sup>                                                                                                                                                                | [3]               |
| SA114                   | Clinical isolate : Amp <sup>r</sup> , Dox <sup>r</sup>                                                                                                                                                               | [3]               |
| SA116                   | Clinical isolate : Erm <sup>r</sup>                                                                                                                                                                                  | [3]               |
| SA124                   | Clinical isolate : Erm <sup>r</sup>                                                                                                                                                                                  | [3]               |
| SA126                   | Clinical isolate : Amp <sup>r</sup> , Dox <sup>r</sup>                                                                                                                                                               | [3]               |
| SA127                   | Clinical isolate : Amp <sup>r</sup> , Dox <sup>r</sup>                                                                                                                                                               | [3]               |
| SA135                   | Clinical isolate : Erm <sup>r</sup>                                                                                                                                                                                  | [3]               |
| SA139                   | Clinical isolate : Erm <sup>r</sup>                                                                                                                                                                                  | [3]               |

Chl<sup>r</sup>, Cyp<sup>r</sup>, Erm<sup>r</sup>, Flx<sup>r</sup>, Im/Cs<sup>r</sup>, Kan<sup>r</sup>, Met<sup>r</sup>, Ofxa<sup>r</sup>, Tet<sup>r</sup>, Vm<sup>r</sup>, Amp<sup>r</sup>, Dox<sup>r</sup>, Aug<sup>r</sup>, Gen<sup>r</sup> and Nis<sup>r</sup> résistance to : chloramphenicol; Cyprofloxacin; Erythromycin; Flomoxef; Imipenem/CilaSAatin sodium; Kanamycin; Méthicillin; Ofloxacin; Tetracycline; Vancomycin ; Ampicillin ; Doxycycline ; Augmentin ; Gentamicin ; Nisin respectively, SA : *SAaphyococcus aureus*.

**Table S2. Gram-negative bacteria and features**

| Strains                          | Features and References                                                                                                                                                                   |
|----------------------------------|-------------------------------------------------------------------------------------------------------------------------------------------------------------------------------------------|
| <i>Escherichia coli</i>          |                                                                                                                                                                                           |
| ATCC8739                         | Reference strain                                                                                                                                                                          |
| AG100                            | Wild-type <i>E. coli</i> K-12 [4]                                                                                                                                                         |
| AG100 <sub>A<sup>TET</sup></sub> | $\Delta$ <i>acrAB</i> mutant AG100, with over-expressing <i>acrF</i> gene ; TET <sup>R</sup> [4]                                                                                          |
| AG102                            | $\Delta$ <i>acrAB</i> mutant AG100, owing <i>acrF</i> gene markedly over-expressed; TET <sup>R</sup> [5, 6]                                                                               |
| MC4100                           | Wild type <i>E. coli</i> [7]                                                                                                                                                              |
| <i>Enterobacter aerogenes</i>    |                                                                                                                                                                                           |
| ATCC13048                        | Reference strains                                                                                                                                                                         |
| CM64                             | CHL <sup>R</sup> resistant variant obtained from ATCC13048 over-expressing the AcrAB pump [8]                                                                                             |
| EA3                              | Clinical MDR isolate; CHL <sup>R</sup> , NOR <sup>R</sup> , OFX <sup>R</sup> , SPX <sup>R</sup> , MOX <sup>R</sup> , CFT <sup>R</sup> , ATM <sup>R</sup> , FEP <sup>R</sup> [9, 10]       |
| EA27                             | Clinical MDR isolate exhibiting energy-dependent norfloxacin and chloramphenicol efflux with KAN <sup>R</sup> AMP <sup>R</sup> NAL <sup>R</sup> STR <sup>R</sup> TET <sup>R</sup> [9, 10] |
| EA289                            | KAN sensitive derivative of EA27 [11]                                                                                                                                                     |
| EA294                            | EA289 <i>acrA</i> ::KAN <sup>R</sup> [11]                                                                                                                                                 |
| EA298                            | EA 289 <i>tolC</i> ::KAN <sup>R</sup> [11]                                                                                                                                                |
| <i>Enterobacter cloacae</i>      |                                                                                                                                                                                           |
| ECCI69                           | Clinical MDR isolates, CHL <sup>R</sup> [12]                                                                                                                                              |
| <i>Klebsiella pneumoniae</i>     |                                                                                                                                                                                           |
| ATCC12296                        | Reference strains                                                                                                                                                                         |
| KP55                             | Clinical MDR isolate, TET <sup>R</sup> , AMP <sup>R</sup> , ATM <sup>R</sup> , CEF <sup>R</sup> [13]                                                                                      |
| KP63                             | Clinical MDR isolate, TET <sup>R</sup> , CHL <sup>R</sup> , AMP <sup>R</sup> , ATM <sup>R</sup> [13]                                                                                      |
| K24                              | AcrAB-TolC, Laboratory collection of UNR-MD1, University of Marseille, France [12]                                                                                                        |
| <i>Providencia stuartii</i>      |                                                                                                                                                                                           |
| NEA16                            | Clinical MDR isolate, AcrAB-TolC                                                                                                                                                          |
| PS299645                         | Clinical MDR isolate, AcrAB-TolC [14]                                                                                                                                                     |
| <i>Pseudomonas aeruginosa</i>    |                                                                                                                                                                                           |
| PA 01                            | Reference strains                                                                                                                                                                         |
| PA 124                           | MDR clinical isolate [15]                                                                                                                                                                 |

<sup>a</sup>AMP, ATM<sup>R</sup>, CEF<sup>R</sup>, CFT<sup>R</sup>, CHL<sup>R</sup>, FEP<sup>R</sup>, KAN<sup>R</sup>, MOX<sup>R</sup>, OFX<sup>R</sup>, STR<sup>R</sup>, TET<sup>R</sup>. Resistance to ampicillin, aztreonam, cephalothin, cefadroxil, chloramphenicol, cefepime, kanamycin, moxalactam, ofloxacin, streptomycin, and tetracycline; MDR : Multidrug resistant; AcrAB-TolC efflux pump AcrAB associate to TolC porin,

## References

1. A. Paudel, H. Hamamoto, Y. Kobayashi, S. Yokoshima, T. Fukuyama, and K. Sekimizu. "Identification of novel deoxyribofuranosyl indole antimicrobial agents," *J Antibiot (Tokyo)*, vol. 65, no. 2, pp. 53-57.
2. J.P. Dzoyem, H. Hamamoto, B. Ngameni, B.T. Ngadjui, and K. Sekimizu. "Antimicrobial action mechanism of flavonoids from *Dorstenia* species," *Drug Discov Ther*, vol. 7, no. 2, pp. 66-72.
3. T.J.O. Ngalani, [*Influence de la multi-résistance des bactéries entériques aux antibiotiques sur l'état immunologique des patients séropositifs au VIH venus en consultation à l'hôpital Adlucem Banka de Bafang*], Department of Biochemistry, University of Dschang, Cameroon, 2015.
4. M. Viveiros, A. Jesus, M. Brito, et al. "Inducement and reversal of tetracycline resistance in *Escherichia coli* K-12 and expression of proton gradient-dependent multidrug efflux pump genes," *Antimicrob Agents Chemother*, vol. 49, no. 8, pp. 3578-3582.
5. C.A. Elkins and L.B. Mullis. "Substrate competition studies using whole-cell accumulation assays with the major tripartite multidrug efflux pumps of *Escherichia coli*," *Antimicrob Agents Chemother*, vol. 51, no. 3, pp. 923-929.
6. V. Kuete, S. Alibert-Franco, K.O. Eyong, et al. "Antibacterial activity of some natural products against bacteria expressing a multidrug-resistant phenotype," *Int J Antimicrob Agents*, vol. 37, no. 2, pp. 156-161.
7. P. Baglioni, L. Bini, S. Liberatori, V. Pallini, and L. Marri. "Proteome analysis of *Escherichia coli* W3110 expressing an heterologous sigma factor," *Proteomics*, vol. 3, no. 6, pp. 1060-1065.
8. D. Ghisalberti, M. Masi, J.M. Pages, and J. Chevalier. "Chloramphenicol and expression of multidrug efflux pump in *Enterobacter aerogenes*," *Biochem Biophys Res Commun*, vol. 328, no. 4, pp. 1113-1118.
9. M. Mallea, J. Chevalier, C. Bornet, et al. "Porin alteration and active efflux: two in vivo drug resistance strategies used by *Enterobacter aerogenes*," *Microbiology*, vol. 144 ( Pt 11), pp. 3003-3009.
10. M. Mallea, A. Mahamoud, J. Chevalier, et al. "Alkylaminoquinolines inhibit the bacterial antibiotic efflux pump in multidrug-resistant clinical isolates," *Biochem J*, vol. 376, no. Pt 3, pp. 801-805.
11. E. Pradel and J.M. Pages. "The AcrAB-TolC efflux pump contributes to multidrug resistance in the nosocomial pathogen *Enterobacter aerogenes*," *Antimicrob Agents Chemother*, vol. 46, no. 8, pp. 2640-2643.
12. A.G. Fankam, V. Kuete, I.K. Voukeng, J.R. Kuate, and J.M. Pages. "Antibacterial activities of selected Cameroonian spices and their synergistic effects with antibiotics against multidrug-resistant phenotypes," *BMC Complement Altern Med*, vol. 11, p. 104.
13. J. Chevalier, J.M. Pages, A. Eyraud, and M. Mallea. "Membrane permeability modifications are involved in antibiotic resistance in *Klebsiella pneumoniae*," *Biochem Biophys Res Commun*, vol. 274, no. 2, pp. 496-499.
14. Q.T. Tran, K.R. Mahendran, E. Hajjar, et al. "Implication of porins in beta-lactam resistance of *Providencia stuartii*," *J Biol Chem*, vol. 285, no. 42, pp. 32273-32281.
15. V. Lorenzi, A. Muselli, A.F. Bernardini, et al. "Geraniol restores antibiotic activities against multidrug-resistant isolates from gram-negative species," *Antimicrob Agents Chemother*, vol. 53, no. 5, pp. 2209-2211.
